# Supplementary material
Source: PubMed Central journal article supplement (PMC1693747)
Supplement: pnas_0605777103_2.pdf [file pnas_0605777103_2.pdf]

|           |       |     |                                                                                                                                                                                                                                                       |     |
|-----------|-------|-----|-------------------------------------------------------------------------------------------------------------------------------------------------------------------------------------------------------------------------------------------------------|-----|
|           |       | 1   | -----                                                                                                                                                                                                                                                 | 50  |
| CP-TK     | (1)   |     | -----                                                                                                                                                                                                                                                 |     |
| PoMVab    | (1)   |     | MSGEQTEQISKDQAAAEQARKEQIAEGEKAAESSEAEERRKKNIAEIAKL                                                                                                                                                                                                    |     |
| PoMVII    | (1)   |     | MSGEQTEQISKDKAVAAEQARKEQIAEGKKAESPVEERRKKNIAEIAKL                                                                                                                                                                                                     |     |
| Consensus | (1)   |     | MSGEQTEQISKD A AAEQARKEQIAEG KAAES E ERRKKNIAEIAKL                                                                                                                                                                                                    |     |
|           |       | 51  | -----                                                                                                                                                                                                                                                 | 100 |
| CP-TK     | (1)   |     | -----MTTPANTTQAVGSTTSTTTTTTGA                                                                                                                                                                                                                         |     |
| PoMVab    | (51)  |     | NEKAWGAKKQATEREETTAALLERFNLLKEWHLNQVNNKVKNPAMESGT                                                                                                                                                                                                     |     |
| PoMVII    | (51)  |     | NEKAREAKKQATEQEETTALLERFNLLKEWHLNQVNNKVKNPAMESET                                                                                                                                                                                                      |     |
| Consensus | (51)  |     | NEKA AKKQATE EETT SLLERFNLLKEWHLNQVNNKVKNPAMESGT                                                                                                                                                                                                      |     |
|           |       | 101 | -----                                                                                                                                                                                                                                                 | 150 |
| CP-TK     | (25)  |     | TPAN-----SGLFTIPDGDFDFSTAKAVVASNAVATNEDLAKIQEIKK                                                                                                                                                                                                      |     |
| PoMVab    | (101) |     | EPALADELKPDMSNLRFARPTVTDLQMKWNAESNKMATADDMAFIEAEFQ                                                                                                                                                                                                    |     |
| PoMVII    | (101) |     | EPALADELKPDMSNLRFARPTVTDLQMKWNAESNKMATADDMAFIEAEFQ                                                                                                                                                                                                    |     |
| Consensus | (101) |     | EPALADELKPDMSNLRFARPTVTDLQMKWNAESNKMATADDMAFIEAEFQ                                                                                                                                                                                                    |     |
|           |       | 151 | -----                                                                                                                                                                                                                                                 | 200 |
| CP-TK     | (67)  |     | DMKTPSDTMAQAAWDLVRHCADVGSQAQTEMIG-TGPYSNGVSRARLAAA                                                                                                                                                                                                    |     |
| PoMVab    | (151) |     | SLGVPKENLAKVMWTLTRYCVGASSSQYLDPKGEEEEKLYGGVTRAALIAIC                                                                                                                                                                                                  |     |
| PoMVII    | (151) |     | SLGVPKENLAKVMWTLTRYCVGASSSQYLDPKGEEEEKLCGGVTRAALIAIC                                                                                                                                                                                                  |     |
| Consensus | (151) |     | SLGVPKENLAKVMWTLTRYCVGASSSQYLDPKGEEEEKL GGVTRAALIAIC                                                                                                                                                                                                  |     |
|           |       | 201 | -----                                                                                                                                                                                                                                                 | 250 |
| CP-TK     | (116) |     | IKEVC <del>T</del> LRQFC <del>K</del> KYAPV <del>V</del> VNW <del>M</del> LT <del>N</del> NS <del>P</del> PAN <del>W</del> QA <del>Q</del> GF <del>K</del> PE <del>H</del> KFAAFDF <del>F</del> D                                                     |     |
| PoMVab    | (201) |     | IKKRSTLRKV <del>C</del> RL <del>Y</del> APIV <del>V</del> W <del>N</del> Y <del>M</del> LV <del>N</del> N <del>A</del> PPED <del>W</del> Q <del>S</del> KG <del>Y</del> TEET <del>K</del> F <del>A</del> A <del>F</del> D <del>T</del> F <del>D</del> |     |
| PoMVII    | (201) |     | IKKRSTLRKV <del>C</del> RL <del>Y</del> APIV <del>V</del> W <del>N</del> Y <del>M</del> LV <del>N</del> N <del>V</del> PPED <del>W</del> Q <del>S</del> KG <del>Y</del> TEET <del>K</del> F <del>A</del> A <del>F</del> D <del>T</del> F <del>D</del> |     |
| Consensus | (201) |     | IKKRSTLRKV <del>C</del> RL <del>Y</del> APIV <del>V</del> W <del>N</del> Y <del>M</del> LV <del>N</del> N <del>A</del> PPED <del>W</del> Q <del>S</del> KG <del>Y</del> TEET <del>K</del> F <del>A</del> A <del>F</del> D <del>T</del> F <del>D</del> |     |
|           |       | 251 | -----                                                                                                                                                                                                                                                 | 300 |
| CP-TK     | (166) |     | GVTNPAAIITPK <del>E</del> GLMR <del>P</del> PS <del>E</del> AE <del>M</del> NA <del>A</del> QTAA <del>F</del> V <del>K</del> IT <del>K</del> ARA <del>Q</del> S <del>N</del> DFAS <del>L</del> DA <del>A</del>                                        |     |
| PoMVab    | (251) |     | FVMNPAAIQ <del>P</del> LEGLIR <del>S</del> P <del>T</del> KA <del>E</del> IIANETH <del>K</del> RIAL <del>D</del> RN- <del>A</del> NNER <del>F</del> AN <del>L</del> G <del>S</del> E                                                                  |     |
| PoMVII    | (251) |     | FVMNPAAIQ <del>P</del> LEGLIR <del>S</del> P <del>T</del> KA <del>E</del> IIANETH <del>K</del> RIAL <del>D</del> RN- <del>A</del> NNER <del>F</del> AN <del>L</del> G <del>S</del> E                                                                  |     |
| Consensus | (251) |     | FVMNPAAIQ <del>P</del> LEGLIR <del>S</del> P <del>T</del> KA <del>E</del> IIANETH <del>K</del> RIAL <del>D</del> RN ANNERFANLGSE                                                                                                                      |     |
|           |       | 301 | -----                                                                                                                                                                                                                                                 | 334 |
| CP-TK     | (216) |     | VTRGRITGTTVAEAVVSLPPP-----                                                                                                                                                                                                                            |     |
| PoMVab    | (300) |     | ITGGKFGCRVGT <del>K</del> W <del>R</del> ES <del>K</del> CDN <del>G</del> GS <del>Y</del> PYD <del>V</del> PD <del>Y</del> AG                                                                                                                         |     |
| PoMVII    | (300) |     | ITGGKFGCRVGT <del>K</del> W <del>R</del> ES <del>K</del> CDN <del>G</del> GS <del>Y</del> PYD <del>V</del> PD <del>Y</del> AG                                                                                                                         |     |
| Consensus | (301) |     | ITGGKFGCRVGT <del>K</del> W <del>R</del> ES <del>K</del> CDN <del>G</del> GS <del>Y</del> PYD <del>V</del> PD <del>Y</del> AG                                                                                                                         |     |
