# Supplementary material
Source: PubMed Central journal article supplement (PMC1693747)
Supplement: pnas_0605777103_3.pdf [file pnas_0605777103_3.pdf]

Proportion of Plants

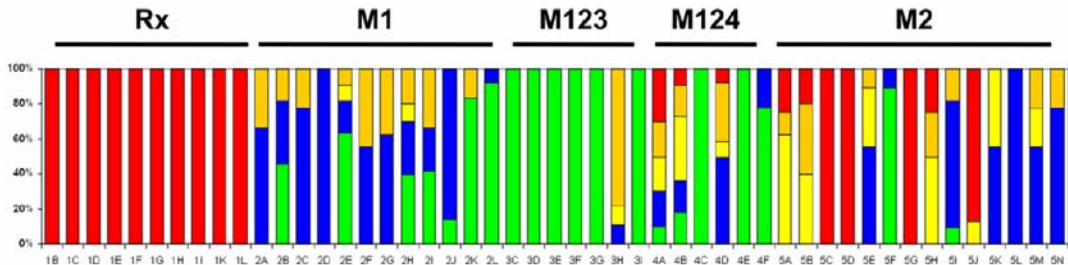

Lines

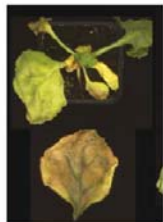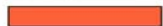

Death

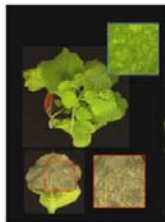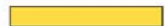

Systemic  
HR

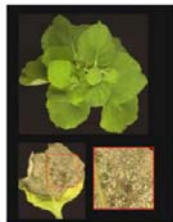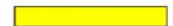

Spreading  
Local lesions

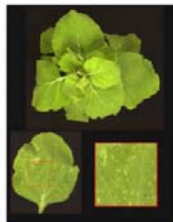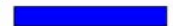

Local lesions

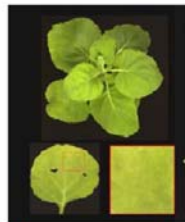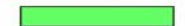

Extreme  
resistance
