# Supplementary material
Source: PubMed Central journal article supplement (PMC1693747)

Rx

M1

M2

M3

M4

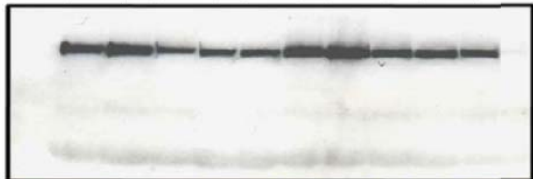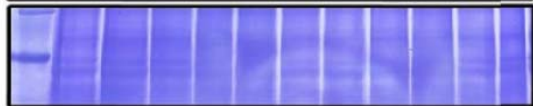

Supplement: pnas_0605777103_1.pdf [file pnas_0605777103_1.pdf]

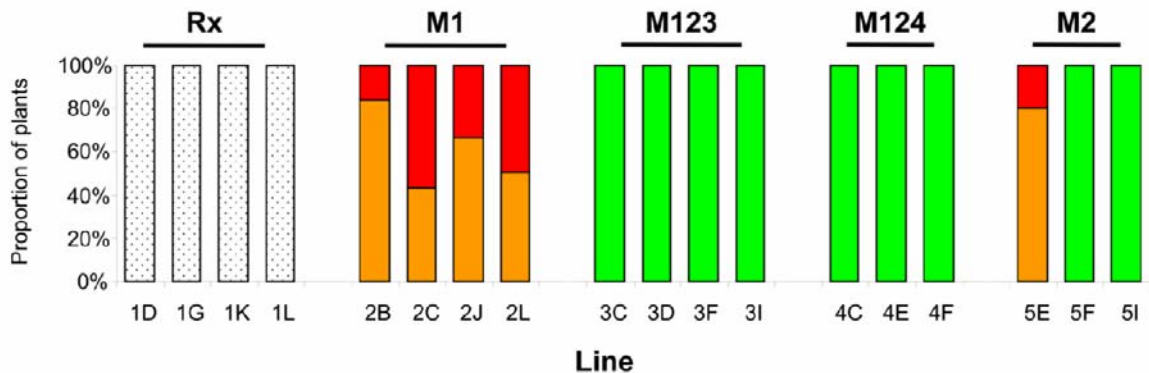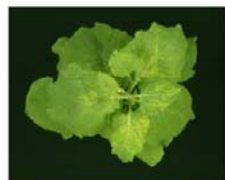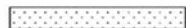

Susceptible

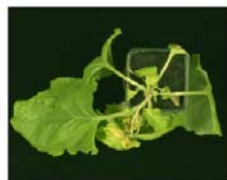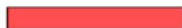

Death

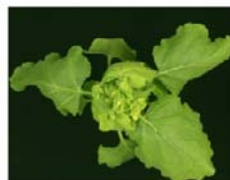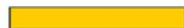

Systemic  
necrosis

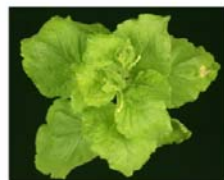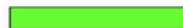

Resistant

Supplement: pnas_0605777103_4.pdf [file pnas_0605777103_4.pdf]

# Line

Rx

M1

M123

M124

M2

-/- mock

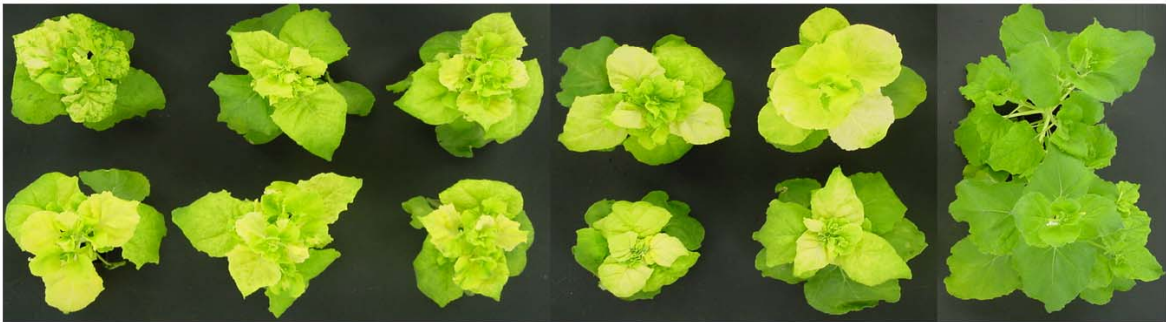

Supplement: pnas_0605777103_5.pdf [file pnas_0605777103_5.pdf]
